# Supplementary material
Source: PubMed Central journal article supplement (PMC6697347)
Supplement: mmc1.pdf [file mmc1.pdf]

YMTHE, Volume 27

## **Supplemental Information**

### **Combined Antitumor Effects of Sorafenib and GPC3-CAR T Cells in Mouse Models of Hepatocellular Carcinoma**

**Xiuqi Wu, Hong Luo, Bizhi Shi, Shengmeng Di, Ruixin Sun, Jingwen Su, Ying Liu, Hua Li, Hua Jiang, and Zonghai Li**

## Supplemental Figures

### Supplementary Figure S1:

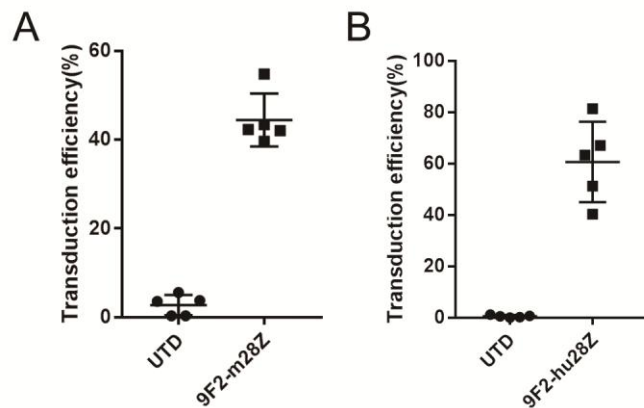

**Supplementary Figure S1: Transduction efficiencies of murine and human CAR T cells.** (A) Mouse T cells were transduced by 9F2-m28Z with positive rate as 45% on average. (B) Human T cells were transduced by 9F2-hu28Z with positive rate as 60% on average. The results are expressed as the mean  $\pm$  SEM.

### Supplementary Figure S2:

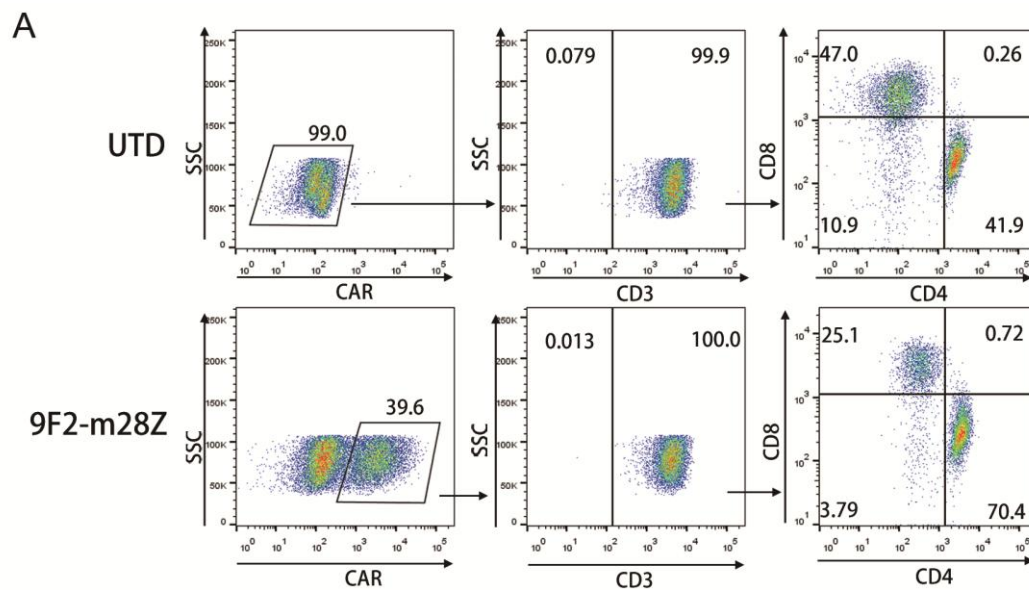

**Supplementary Figure S2: Basic phenotypes of murine CAR T cells.** (A) A representative flow cytometry analysis of CD3, CD4, CD8 expression on untransduced (UTD) mouse T cells and mCAR T cells transduced with 9F2-m28Z.

### Supplementary Figure S3:

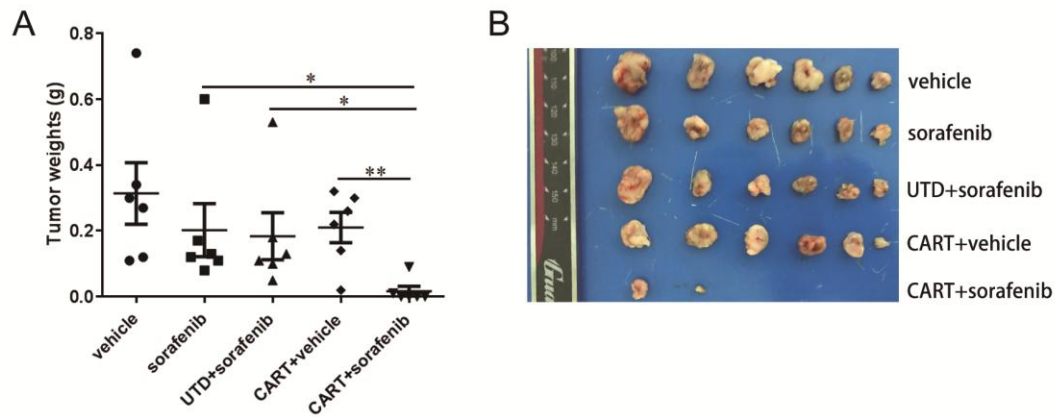

**Supplementary Figure S3: Tumor samples after sorafenib and CAR T cell treatment.** On day 28 after the last determination, mice were euthanized. Then, tumor weight was measured (A) and tumor samples were exhibited in (B). The results are expressed as the mean  $\pm$  SEM. Significance of findings was defined as follows: ns, not significant;  $p > 0.05$ ; \* $p < 0.05$ ; \*\* $p < 0.01$ ; or \*\*\* $p < 0.001$ .

Supplementary Figure S4:

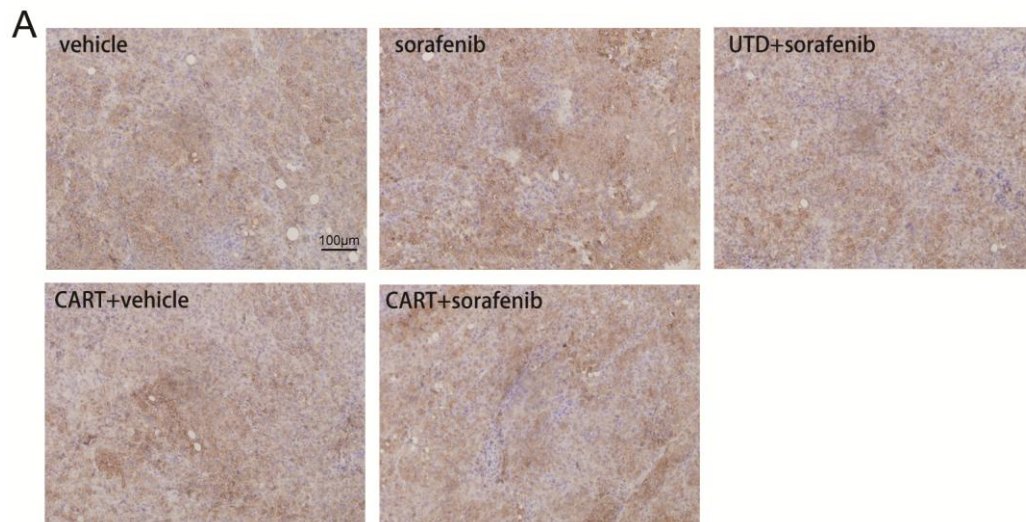

**Supplementary Figure S4: chGPC3 expression within tumor samples after sorafenib and CAR T cell treatment.** (A) Representative immunostaining images of chGPC3 expression in tumor tissues. Scale bars, 100µM.

Supplementary Figure S5:

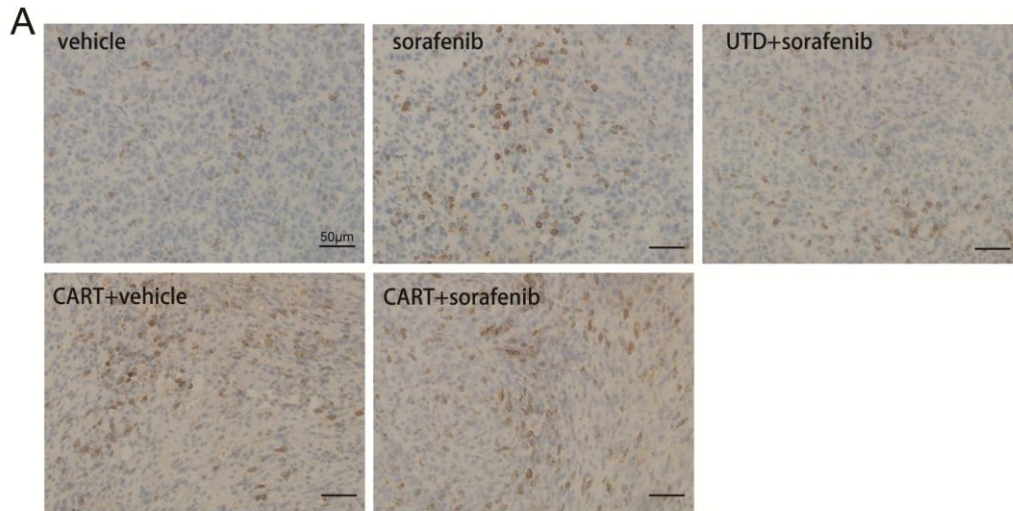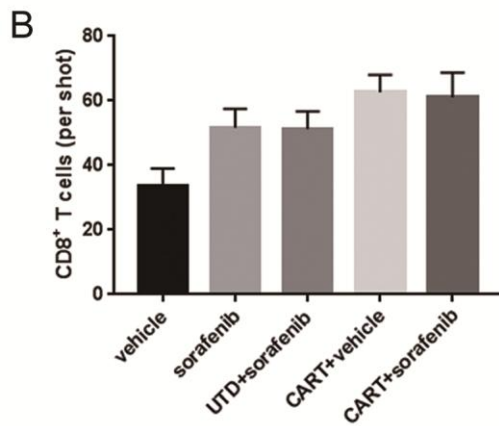

**Supplementary Figure S5: Representative images of CD8<sup>+</sup> mouse T cell infiltration in tumor tissues.** (A) Representative images of CD8<sup>+</sup> mouse T cell infiltration in tumor tissues as detected by immunohistochemistry staining. Scale bars, 50µM. (B) Quantification of CD8<sup>+</sup> mouse T cell infiltration in tumor tissues (n=5). The results are expressed as the mean ± SEM.

Supplementary Figure S6:

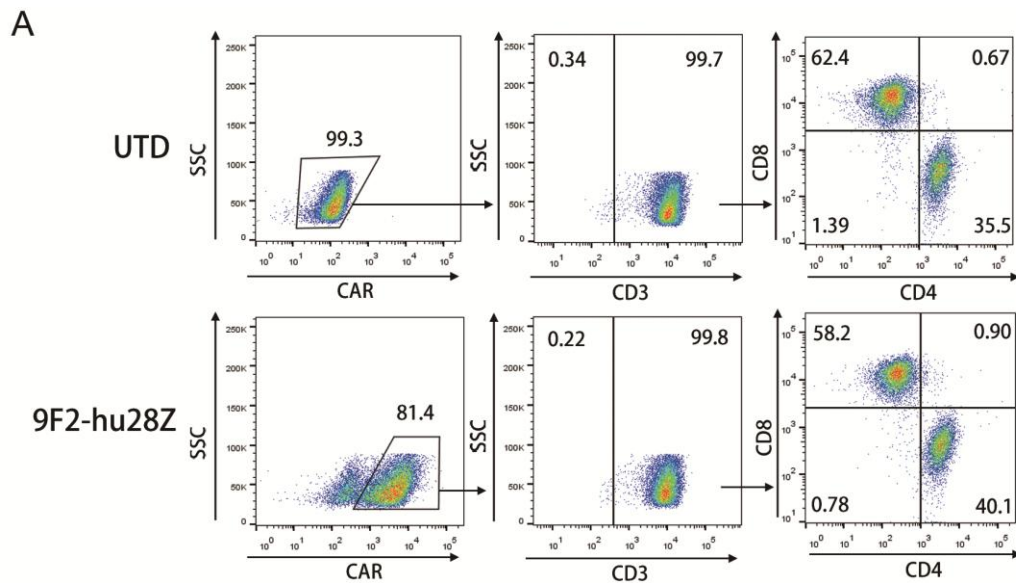

**Supplementary Figure S6: Basic phenotypes of human CAR T cells.** (A) A representative flow cytometry analysis of CD3, CD4, CD8 expression on untransduced (UTD) human T cells and huCAR T cells transduced with 9F2-hu28Z.

Supplementary Figure S7:

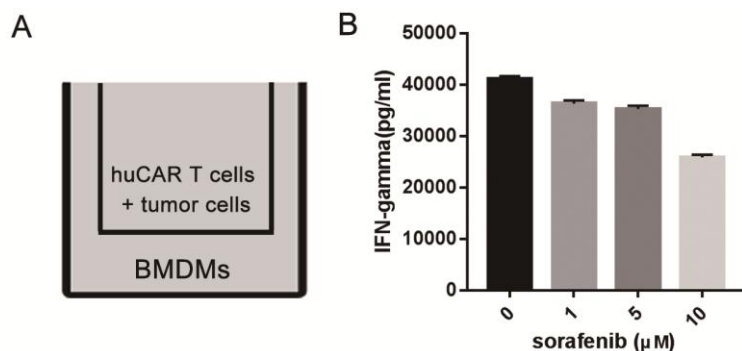

**Supplementary Figure S7: Sorafenib-treated BMDMs did not enhance the function of huCAR T cells in vitro.** (A and B) Transwell co-culture of huCAR T cells with BMDMs. BMDMs were treated with sorafenib and LPS (10 ng/mL) for 8 hours. Then huCAR T cells and tumor cells were added into the upper chamber for another 16h co-culture with sorafenib-treated BMDMs. IFN- $\gamma$  expression in supernatants were assayed by cytometric bead array (CBA). Data reflects mean  $\pm$  SD of triplicate wells.

Supplementary Figure S8:

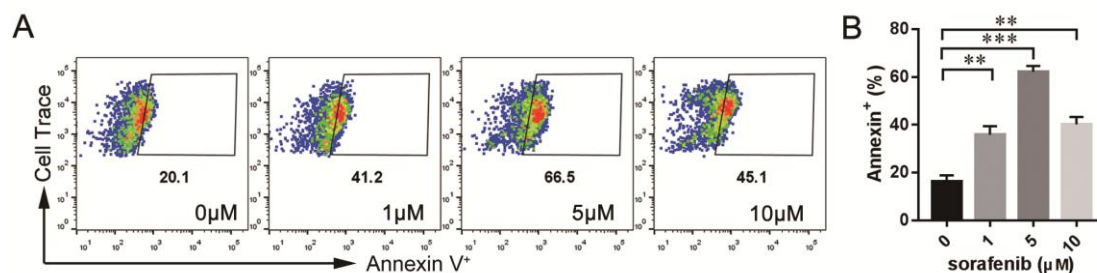

**Supplementary Figure S8: Apoptosis of Hepa1-6-chGPC3 cells was significantly increased when mCAR T cells were combined with sorafenib.** (A and B) Representative flow cytometry plots and quantification results showing the frequencies of Annexin V<sup>+</sup> Hepa1-6-chGPC3 cells after sorafenib and mCAR T cells treatment. Before Annexin V Staining, Hepa1-6-chGPC3 cells were pre-labeled with Cell Trace Violet dye and then treated with mCAR T cells at 1: 10 ratio and various concentrations of sorafenib for 24h. Results are expressed as mean  $\pm$  SEM of triplicates. Significance of findings was defined as follows: ns, not significant;  $p > 0.05$ ; \* $p < 0.05$ ; \*\* $p < 0.01$ ; or \*\*\* $p < 0.001$ .
